# Supplementary material for: Task-related hemodynamic responses in human early visual cortex are modulated by task difficulty and behavioral performance
Source: eLife journal article supplement (doi:10.7554/elife.73018), 2022-04-07

**A**

block alternation: grating switches hemifield every 9 s for 14 cycles

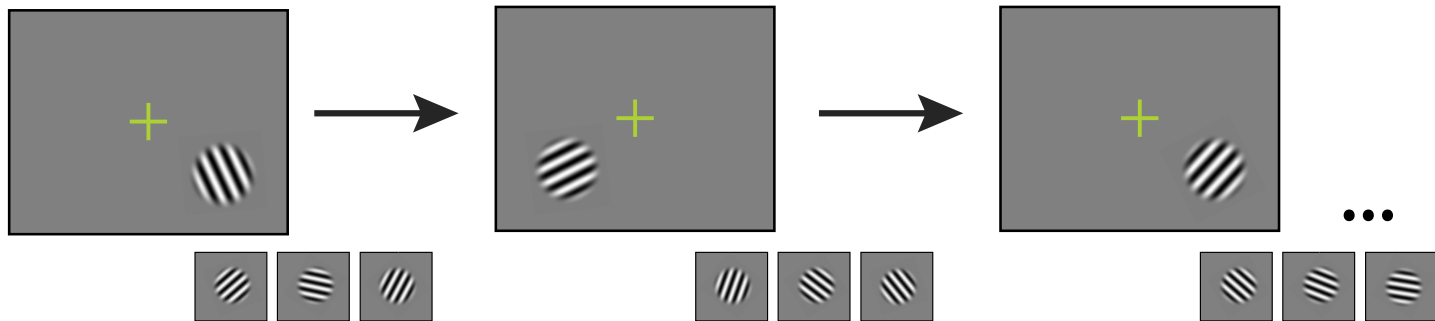**B**

adaptation prevention: gratings change orientation &amp; phase every 200 ms

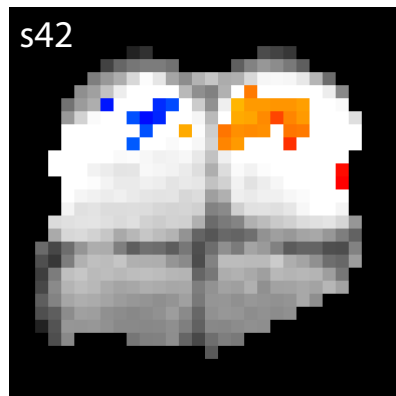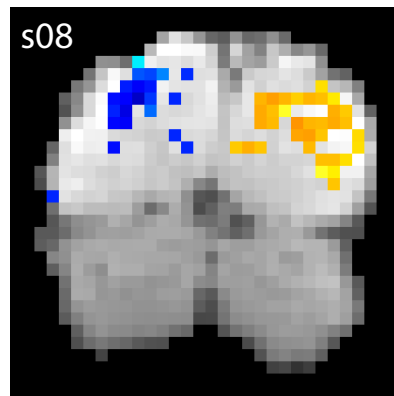

6  
5  
4  
3  
2  
1  
0

left Phase right

**C**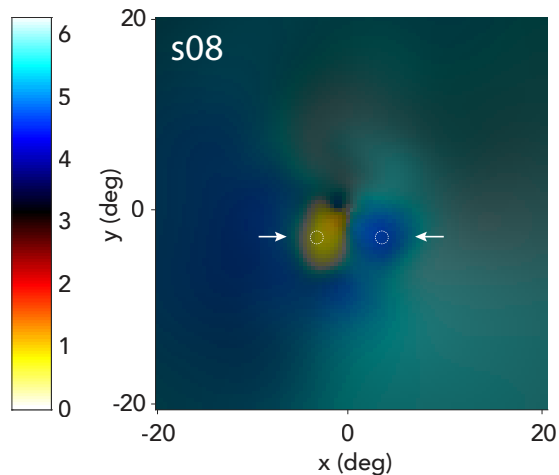

Supplement: supp [file elife-73018-supp-v1.zip]
