# Supplementary figures and images for: Task-related hemodynamic responses in human early visual cortex are modulated by task difficulty and behavioral performance
Source: eLife journal article supplement (doi:10.7554/elife.73018), 2022-04-07

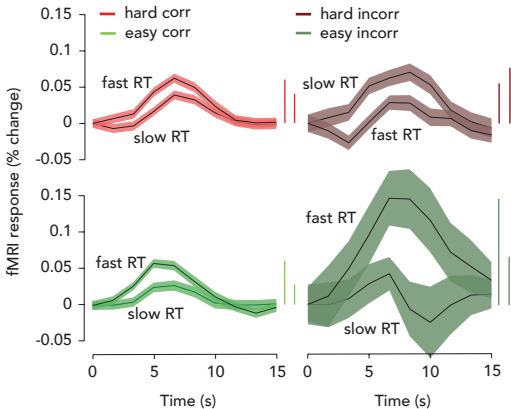

Supplement: supp [file elife-73018-supp-v1.zip]

**A****Data**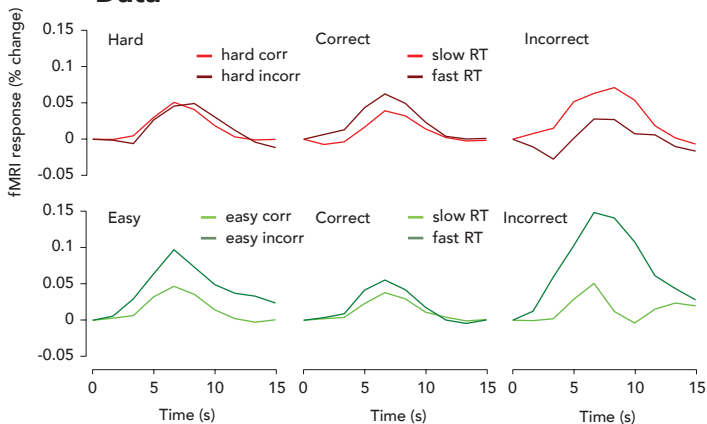**B****fMRI\_TO+fMRI\_BP Simulation**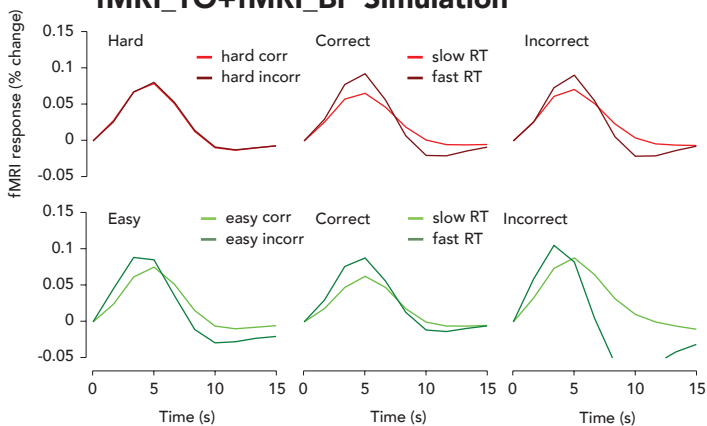**C****fMRI\_ToT Simulation**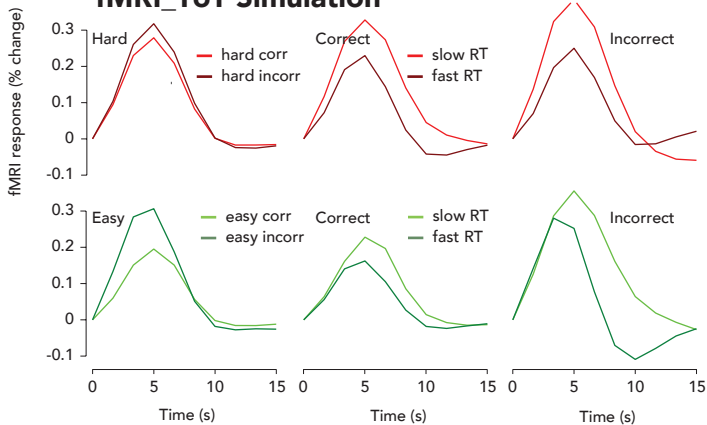

Supplement: supp [file elife-73018-supp-v1.zip]

**A**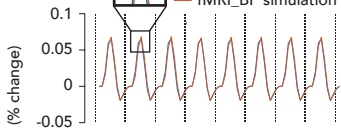**B**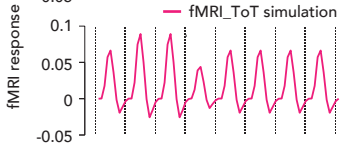**C**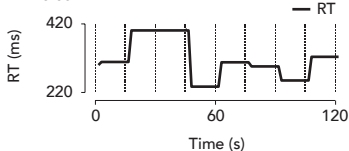

Supplement: supp [file elife-73018-supp-v1.zip]

LH

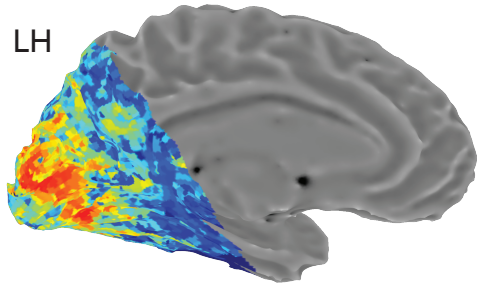

RH

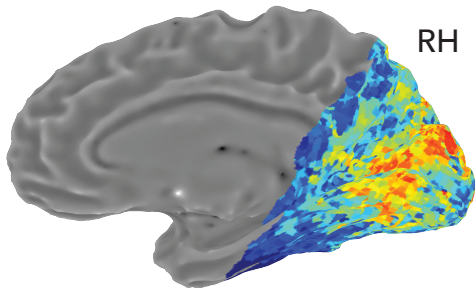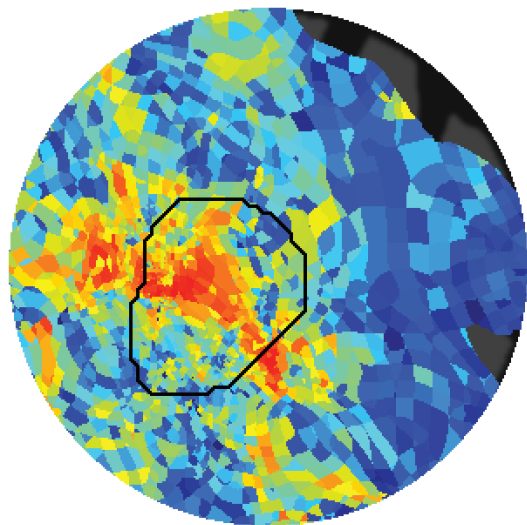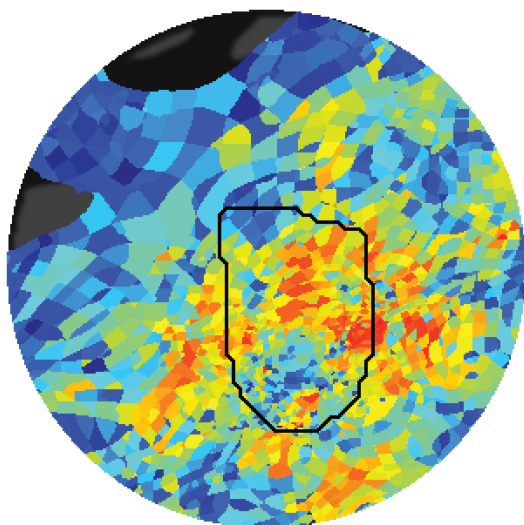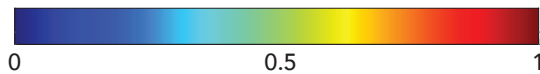

coherence

Supplement: supp [file elife-73018-supp-v1.zip]
